# Supplementary material
Source: PubMed Central journal article supplement (PMC2705057)
Supplement: pp.109.140269_1.pdf [file pp.109.140269_1.pdf]

## SUPPLEMENTAL INFORMATION

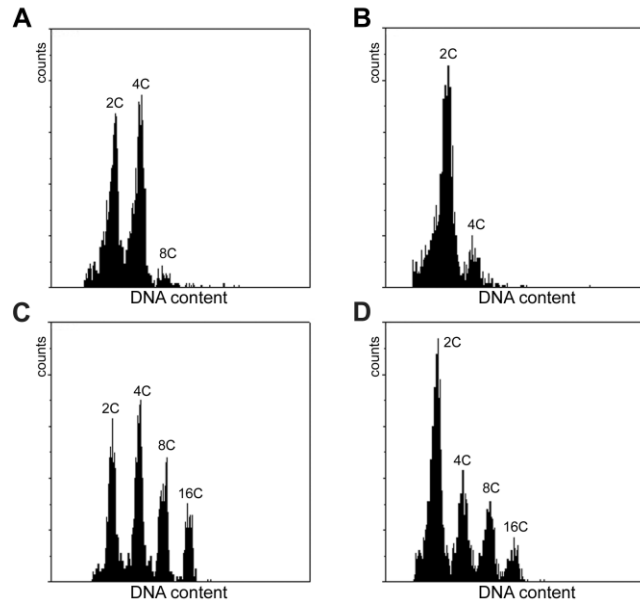

**Figure S1.** Effect of co-expression of *CYCA2;3-nGFP* and *CDKB1;1-cGFP*. Col-0 seedlings (A and C) and plants co-expressing *CYCA2;3-nGFP* and *CDKB1;1-cGFP* (B and D) were grown for 12 DAG on agar medium and 1<sup>st</sup> leaf pairs and roots were harvested. Leafs (A and B) and roots (C and D) were subjected to flow cytometry (C and D).
